# Supplementary material for: Protective intraoperative ventilation with higher versus lower levels of positive end-expiratory pressure in obese patients (PROBESE): study protocol for a randomized controlled trial
Source: PubMed Central journal article supplement (PMC5410049; doi:10.1186/s13063-017-1929-0), 2017-04-28

# **PROBESE**

## **Standard Operating Procedures (SOP)**

### ***Biomarkers***

#### ***Collection biomarkers***

- *Pre-operative = time-point 0*
- *Directly post-operative = time-point 1*
- *Day 5 post-operative = time-point 5*

#### **1. Blood withdrawal**

##### **Via venous canule (venflon):**

- Apply tourniquet
- Introduce the venous canule (at least, 20G, 32 mm, pink. Preferably larger)
- Loosen the tourniquet, but do not remove completely (gentle pressure)
- Withdraw blood directly out of the venflon, without the aid of a long plastic extension piece
- Withdraw 1 vacuum “Citrate tube” (blue, plastic, 2.7 ml, BD 0.109 M citrate);
- Withdraw 1 vacuum “EDTA tube” (purple, plastic, 4 ml)
- Withdraw 1 vacuum “Heparine tube” (green, plastic, 4.5 ml)
- N.B. Take *one* vacuum precursor tube in case the venflon was installed more than 5 minutes ago or when the venflon was washed with saline (0.9% NaCl).
- Mix gently without shaking.
- Bring to the laboratory within 1 hour
- Date of birth and the date and time of blood withdrawal, as well as any peculiarities during blood withdrawal (e.g. difficult to obtain blood etc)

##### **Via vein puncture (in case a venous canule will not be installed):**

- Apply tourniquet
- Introduce needle (21 G green)
- Loosen the tourniquet, but keep gentle pressure
- Withdraw 1 vacuum “citrate tube” (blue, plastic, 2.7 ml, BD 0.109 M citrate);
- Withdraw 1 vacuum “EDTA tube” (purple, plastic, 4 ml)
- Withdraw 1 vacuum “Heparine tube” (green, plastic, 4.5 ml)
- Mix gently without shaking
- Bring to the laboratory within 1 hour
- Date of birth and the date and time of blood withdrawal, as well as any peculiarities during blood withdrawal (e.g. difficult to obtain blood etc)

## 2. Laboratory procedures

### A. Preparation of platelet poor plasma (PPP)

- Bring freshly collected, citrate-anticoagulated (0,109 M BD) whole blood as soon as possible (without shaking, etc) to the lab within 1 hour after blood withdrawal
- Centrifuge the blood for 15 minutes at 1500 - 2000 x g without brake in a swing-out rotor, at room temperature
- Register the time at which the centrifugation of the blood is started.
- When (part of) the samples are haemolytic, please note this on the sample log.
- Carefully collect the upper 2/3 of the (platelet-poor) plasma

### B. Preparation of EDTA and Heparine

- Bring freshly collected, EDTA and Heparine whole blood as soon as possible (without shaking, etc) to the lab within 1 hour after blood withdrawal
- Centrifuge each tube of blood for 15 minutes at 1500 - 2000 x g without brake in a swing-out rotor, at room temperature
- Register the time at which the centrifugation of the blood is started.
- When (part of) the samples are haemolytic, please note this on the sample log.
- Carefully collect the upper 2/3 of the plasma of both tubes

### C. Storage of material

- Aliquot the plasma aliquots in conical centrifuge micro tubes of 2.0 ml
  - Citrate  $\geq 0.5$  ml of PPP in each tube – divided in 2 tubes
  - EDTA  $\geq 1.5$  ml in each tube (total 2 tubes)
  - Heparine  $\geq 1.5$  ml in each tube (total 2 tubes)
- Store the microtubes at  $-80^{\circ}\text{C}$
- Mark the tubes with a sticker, which includes information on the **Institute**, **Patient Identification Number** = PIN (ask Local Investigator), and **time-point of blood collection**, to be one of the following:
  - time-point 0 (= pre-operative)
  - time-point 1 (= direct post-operative)
  - time-point 5 (= day 5 post-operative)

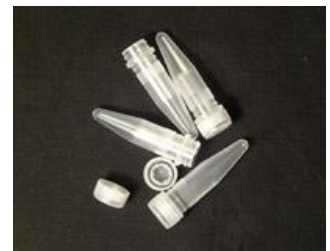

Supplement: 13063_2017_1929_MOESM4_ESM.pdf [file 13063_2017_1929_MOESM4_ESM.pdf]
